# Supplementary material
Source: PubMed Central journal article supplement (PMC8079543)
Supplement: NIHMS1640307-supplement-1.pdf [file NIHMS1640307-supplement-1.pdf]

## Supplemental Data

| Heat Shock Protein (murine) | Forward Primer          | Reverse Primer          |
|-----------------------------|-------------------------|-------------------------|
| <b>mHSP27</b>               | 5'TCAGGCTCAGTGAAGGCAAG  | 5'GGATAGAGCAGCTCGAACCC  |
| <b>mHSP60</b>               | 5'TGGGGTCACTGTTGCAAAGT  | 5" AGATCGTGCCAGAACAGTGG |
| <b>mHSP70</b>               | 5' AGGAGGAGTTCGTGCACAAG | 5' TCTAGACCACACCGGGAGAG |
| <b>mHSP90</b>               | 5' ACAAGCACCTATGGCTGGAC | 5' TTGTCTGCCTCAGCCTTCTG |
| <b>mGST</b>                 | 5' GCACTGACGAGAAGGTGGA  | 5' TCTGAAGTGCATGAGGGCTG |

**Supplementary Table S1.** Oligonucleotide sequences for primers used in qRT-PCR for murine live heat shock protein analysis.

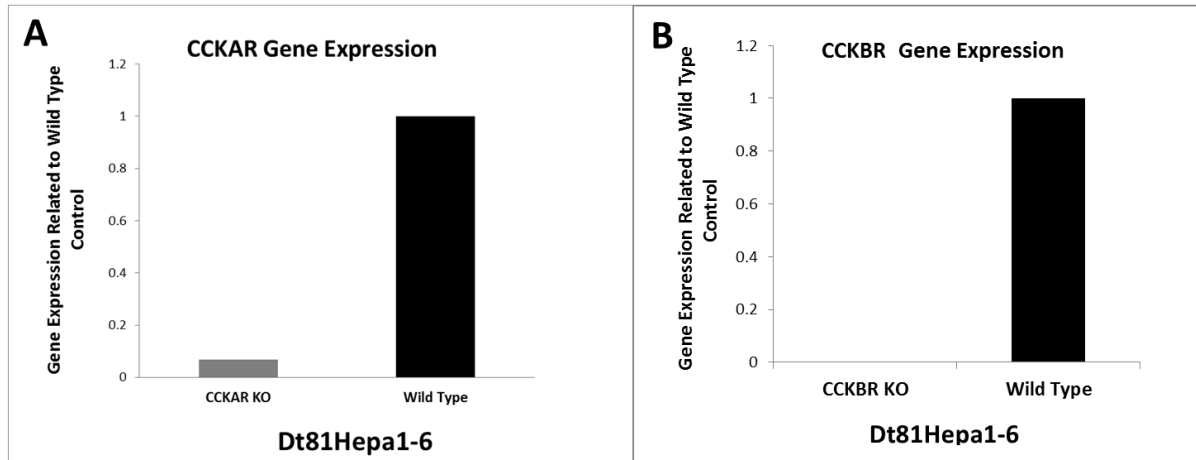

**Supplementary Fig.S1.** mRNA expression by qRT-PCR of CCK receptors in Dt81Hepa1-6 murine HCC cells after gene editing with CRISPR Cas9. **A**, Dt81Hepa1-6 HCC cells are confirmed to have knockout of the CCK-AR when compared to expression in wild type HCC cells. **B**, Dt81Hepa1-6 cells show knockout of the CCK-BR after CRISPR Cas9 compared to wild type cells.

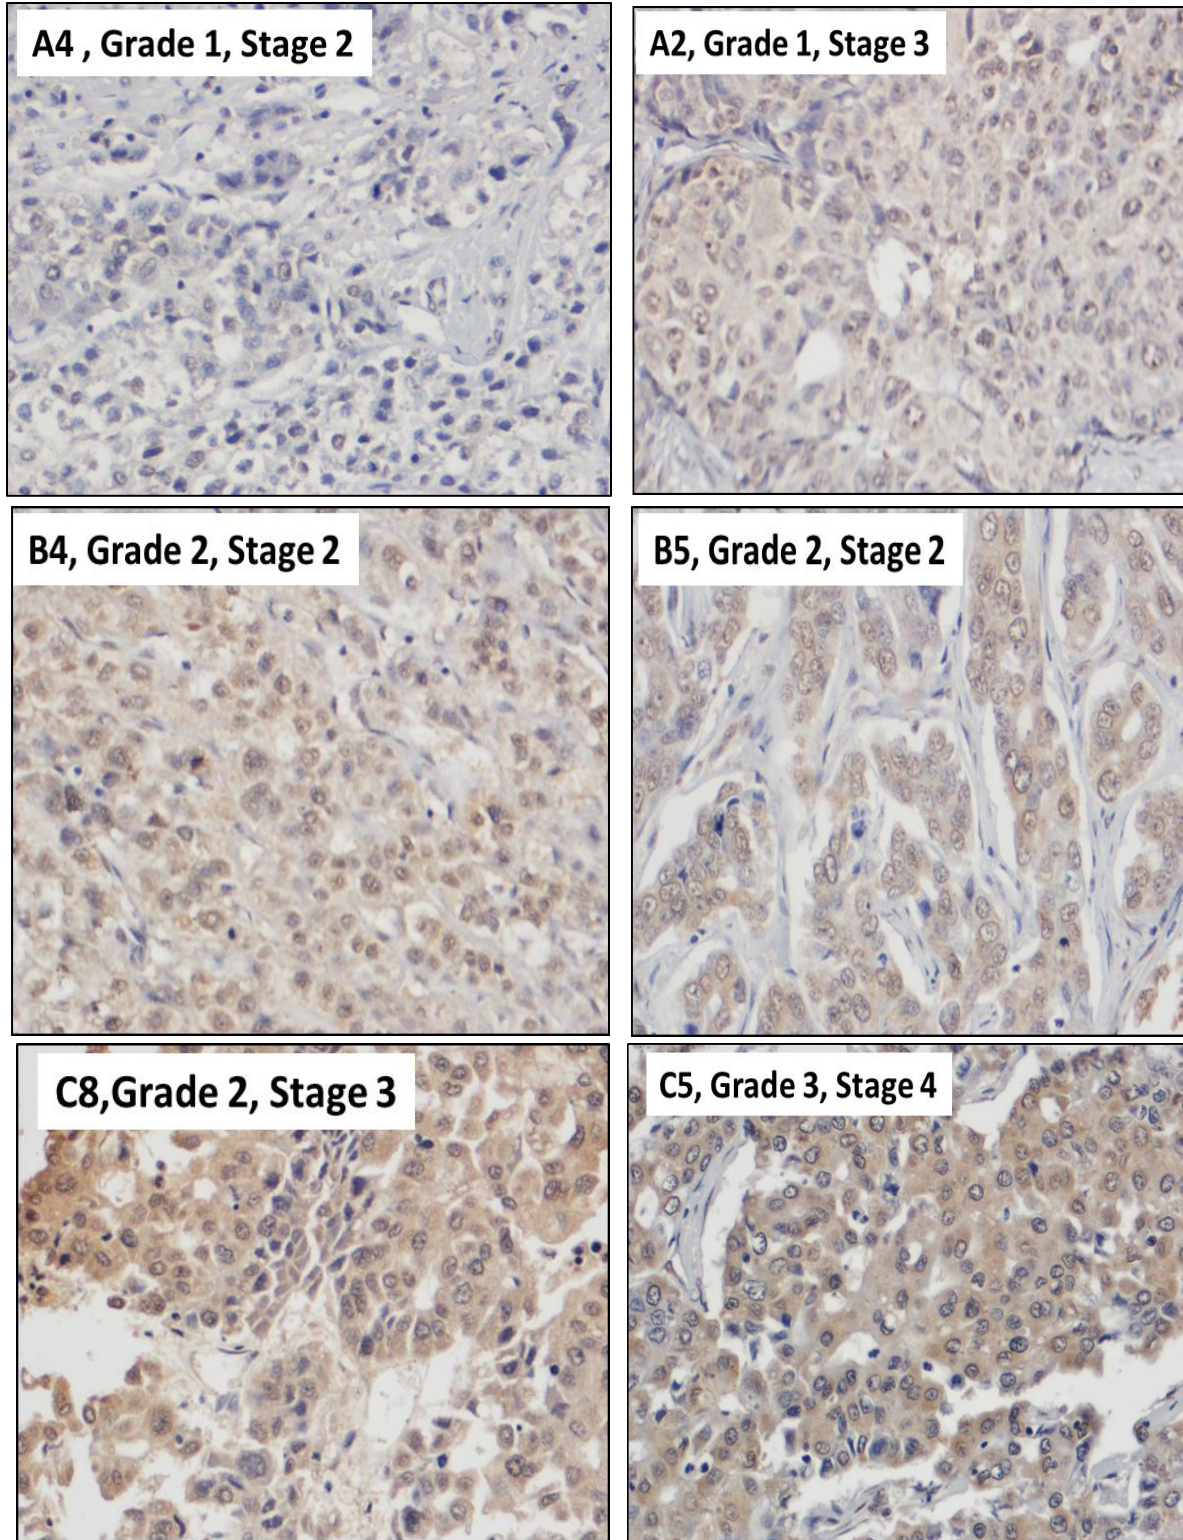

**Supplementary Fig. S2.** CCK-BR staining by IHC increases with stage and grade of tumor. Representative images all taken at 20X from Biomax Liver tissue array #BC03117, Corresponding tissues per location on the array are shown on each figure along with the grade and stage of tumor.

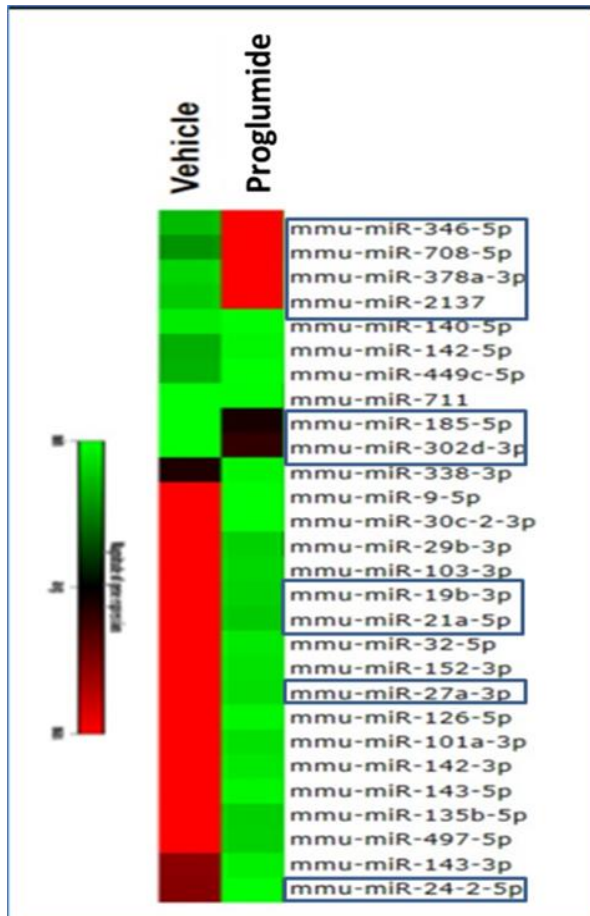

**Supplementary Fig. S3.** Proglumide therapy in the mouse leads to changes in miRNA expression profile. Differential expression of multiple miRNAs between the proglumide treated and untreated vehicle control were identified using a 380 miRNA qPCR-based array. Selective miRNAs that are enclosed in a box are involved with regulation of fibrosis, inflammation, or carcinogenesis.
